# Supplementary material
Source: JCI journal article supplement (doi:10.1172/jci184301)
Supplement: sd1 [file 1]

1 **Supplemental Data**

2 **I. Supplemental Tables**

3 **A. Table S1.** Baseline demographic and allergy characteristics of participants

4 **B. Table S2.** Percentage of participants successfully tolerating predefined cumulative dose during the month-24  
5 oral food challenges

6 **C. Table S3.** Summary of all adverse events, according to Trial Phase (number of participants with event)

7 **D. Table S4.** Difference in dosing-related reactions in year 2 vs year 1 of baked milk OIT for the initial active  
8 group (percentage of doses)

9 **E. Table S5.** Epinephrine use during the second year of the trial

10 **F. Table S6.** Detailed description of T cell populations selected for analysis

11 **G. Table S7.** Baked milk oral immunotherapy dosing schedule

12 **H. Table S8.** Dosing Schedule for Double-Blind, Placebo-Controlled Food Challenges

13 **I. Table S9.** Detailed model parameters

14

15 **II. Supplemental Figures**

16 **A. Figure S1.** Maximum cumulative tolerated dose of baked milk by time on treatment

17 **B. Figure S2.** Percent tolerating dose of unheated milk during month-24 DBPCFC

18 **C. Figure S3.** Gating strategy for sort and flow cytometry analysis

19 **D. Figure S4.** scRNA-Seq supplemental

20 **E. Figure S5.** T cell and antibody measurements by treatment group across all time point

21 **F. Figure S6.** Population changes from 12 to 24 months on treatment

22 **G. Figure S7.** Skin prick test

23 **H. Figure S8.** Correlation analysis supplemental

24

25 **III. Supplemental Appendices**

26 1. Full inclusion/exclusion Criteria

27 2. Study product details

28 3. Double-blind, placebo-controlled food challenge details

29 4. Sample Size, Randomization, and Blinding

30 5. Impact of COVID-19 pandemic

31

|                                                                                           | <b>Milk OIT<br/>(n=15)</b> | <b>Placebo group<br/>(n=15)</b> | <b>All randomized<br/>participants<br/>(n=30)</b> |
|-------------------------------------------------------------------------------------------|----------------------------|---------------------------------|---------------------------------------------------|
| <b>Sex (n (%))*</b>                                                                       |                            |                                 |                                                   |
| Male                                                                                      | 7 (47%)                    | 9 (60%)                         | 16 (53%)                                          |
| Females                                                                                   | 8 (53%)                    | 6 (40%)                         | 14 (47%)                                          |
| <b>Median age, years (range)</b>                                                          | 13 (4-18)                  | 7 (3-14)                        | 11 (3-18)                                         |
| <b>Race (n (%))*</b>                                                                      |                            |                                 |                                                   |
| White                                                                                     | 12 (80%)                   | 9 (60%)                         | 21 (70%)                                          |
| Black                                                                                     | 2 (13%)                    | 2 (13%)                         | 4 (13%)                                           |
| Asian                                                                                     | 1 (7%)                     | 2 (13%)                         | 3 (10%)                                           |
| Native Hawaiian or Other Pacific Islander                                                 | 0                          | 0                               | 0                                                 |
| American Indian or Native Alaskan                                                         | 0                          | 0                               | 0                                                 |
| Multiple races                                                                            | 0                          | 2 (13%)                         | 2 (7%)                                            |
| <b>Ethnicity*</b>                                                                         |                            |                                 |                                                   |
| Hispanic or Latino                                                                        | 0                          | 1 (7%)                          | 1 (3%)                                            |
| Not Hispanic or Latino                                                                    | 15 (100%)                  | 14 (93%)                        | 29 (97%)                                          |
| <b>Milk History</b>                                                                       |                            |                                 |                                                   |
| Age at milk allergy diagnosis (months)<br>(median, range)                                 | 8mo (4-14mo)               | 9mo (4-24mo)                    | 8.5mo (4-24mo)                                    |
| Prior Baked Milk Exposure                                                                 | 12 (80%)                   | 10 (67%)                        | 22 (73%)                                          |
| History of milk reaction                                                                  |                            |                                 |                                                   |
| Unheated only                                                                             | 3 (20%)                    | 5 (33%)                         | 8 (27%)                                           |
| Baked only                                                                                | 3 (20%)                    | 0                               | 3 (10%)                                           |
| Both                                                                                      | 9 (60%)                    | 10 (67%)                        | 19 (63%)                                          |
| <b>Other current atopic history (n (%))</b>                                               |                            |                                 |                                                   |
| Asthma                                                                                    | 11 (73%)                   | 9 (60%)                         | 20 (67%)                                          |
| Atopic dermatitis                                                                         | 8 (53%)                    | 8 (53%)                         | 16 (53%)                                          |
| Allergic rhinitis                                                                         | 10 (67%)                   | 11 (73%)                        | 21 (70%)                                          |
| Non-milk food allergies                                                                   | 12 (80%)                   | 14 (93%)                        | 26 (87%)                                          |
| <b>Laboratory and Skin Testing (median, range)</b>                                        |                            |                                 |                                                   |
| Cow milk IgE (kU/L)                                                                       | 114 (7.2-1625)             | 86.8 (21.6-772)                 | 87.65 (7.2-1625)                                  |
| Alpha lactalbumin IgE (kU/L)                                                              | 20.4 (0.6-556)             | 19.7 (0.2-291)                  | 20 (0.2-556)                                      |
| Beta lactoglobulin igE (kU/L)                                                             | 28.2 (0.4-487)             | 18.8 (4.1-79.3)                 | 24.5 (0.4-487)                                    |
| Casein IgE (kU/L)                                                                         | 75.8 (5.9-1326)            | 52.8 (15.4-652)                 | 64.8 (5.9-1326)                                   |
| Milk IgG4 (mg/L)                                                                          | 8.6 (6.9-12.5)             | 9.4 (7.4-19)                    | 9.2 (6.9-19)                                      |
| Milk skin prick test (mm)                                                                 | 14 (7-23)                  | 13 (7-25)                       | 13.5 (7-25)                                       |
| <b>Screening OFC- Maximum Cumulative Tolerated Dose<sup>†</sup> of Baked Milk Protein</b> |                            |                                 |                                                   |
| 4 mg                                                                                      | 1 (6%)                     | 2 (13%)                         | 3 (10%)                                           |
| 14 mg                                                                                     | 4 (27%)                    | 1 (6%)                          | 5 (17%)                                           |
| 44 mg                                                                                     | 4 (27%)                    | 2 (13%)                         | 6 (20%)                                           |
| 144 mg                                                                                    | 6 (40%)                    | 10 (67%)                        | 16 (53%)                                          |

35 Table S2. Percentage of participants successfully tolerating predefined cumulative dose during the month-24 oral food  
 36 challenges

|                         | <b>N</b> | <b>Initial Active</b> | <b>Placebo cross-over</b> | <b>Difference (95% CI)</b> | <b>p-value<sup>+</sup></b> |
|-------------------------|----------|-----------------------|---------------------------|----------------------------|----------------------------|
| <b>Intent-to-Treat*</b> |          |                       |                           |                            |                            |
| <b>Baked Milk</b>       | 30       |                       |                           |                            |                            |
| 4044 mg                 |          | 9/15 (60%)            | 10/15 (67%)               | 7% (-0.3,0.4)              | 1                          |
|                         |          |                       |                           |                            |                            |
| <b>Unheated Milk</b>    | 30       |                       |                           |                            |                            |
| 2000 mg                 |          | 8/15 (53%)            | 5/15 (33%)                | 20% (-0.5, 0.2)            | 0.46                       |
| 8030 mg                 |          | 4/15 (27%)            | 0/15 (0%)                 | 27% (-0.49,-0.04)          | 0.1                        |
|                         |          |                       |                           |                            |                            |
| <b>Per Protocol</b>     |          |                       |                           |                            |                            |
| <b>Baked Milk</b>       | 24       |                       |                           |                            |                            |
| 4044 mg                 |          | 9/12 (75%)            | 10/12 (83%)               | 8.3% (-0.2,0.4)            | 1                          |
|                         |          |                       |                           |                            |                            |
| <b>Unheated Milk</b>    | 22       |                       |                           |                            |                            |
| 2000 mg                 |          | 8/11 (73%)            | 5/11 (45%)                | 27% (-0.67,0.12)           | 0.39                       |
| 8030 mg                 |          | 4/11 (36%)            | 0/11 (0%)                 | 36% (-0.65,-0.08)          | 0.09                       |

37 <sup>+</sup>p-value- Fisher-Exact

38 \* Tolerated dose was imputed as 0 mg for participants who did not complete the month-24 BM or unheated milk  
 39 DBPCFCs.

40

41

42 Table S3. Summary of all adverse events, according to trial phase (number of participants with event)

|                                              | Initial Dose Escalation |                                 | Build up      |                                 | Maintenance      |                                 | Overall          |                                 |
|----------------------------------------------|-------------------------|---------------------------------|---------------|---------------------------------|------------------|---------------------------------|------------------|---------------------------------|
|                                              | active<br>N/A           | Placebo<br>Cross-over<br>(n=14) | active<br>N/A | Placebo<br>Cross-over<br>(n=14) | active<br>(n=13) | Placebo<br>Cross-over<br>(n=12) | active<br>(n=13) | Placebo<br>Cross-over<br>(n=14) |
| <b>Participants with Adverse Event (n,%)</b> |                         |                                 |               |                                 |                  |                                 |                  |                                 |
| ≥ 1 Adverse Event                            |                         | 4 (28.6)                        |               | 14 (100)                        | 9 (69.2)         | 11 (91.7)                       | 9 (69.2)         | 14 (100)                        |
| ≥ 1 Non-dosing related AE                    |                         | 2 (14.3)                        |               | 13 (92.9)                       | 6 (46.2)         | 3 (25.0)                        | 6 (46.2)         | 14 (100)                        |
| ≥ 1 Dosing-related AE                        |                         | 3 (21.4)                        |               | 14 (100)                        | 8 (61.5)         | 9 (75.0)                        | 8 (61.5)         | 14 (100)                        |
| <b>Symptoms (n,%)</b>                        |                         |                                 |               |                                 |                  |                                 |                  |                                 |
| Oropharyngeal symptoms                       |                         | 2 (14.3)                        |               | 8 (57.1)                        | 4 (30.8)         | 6 (50.0)                        | 4 (30.8)         | 9 (64.3)                        |
| Symptoms other than oropharyngeal            |                         |                                 |               |                                 |                  |                                 |                  |                                 |
| ---Skin                                      |                         | 2 (14.3)                        |               | 8 (57.1)                        | 5 (38.5)         | 4 (33.3)                        | 5 (38.5)         | 9 (64.3)                        |
| ---GI                                        |                         | 0 (0)                           |               | 13 (92.9)                       | 8 (61.5)         | 3 (25.0)                        | 8 (61.5)         | 13 (92.9)                       |
| ---Respiratory                               |                         | 0 (0)                           |               | 10 (71.4)                       | 6 (46.2)         | 3 (25.0)                        | 6 (46.2)         | 10 (71.4)                       |
| <b>Severity of adverse event (n,%)</b>       |                         |                                 |               |                                 |                  |                                 |                  |                                 |
| ---Mild                                      |                         | 4 (28.6)                        |               | 14 (100)                        | 9 (69.2)         | 11 (91.7)                       | 9 (69.2)         | 14 (100)                        |
| ---Moderate                                  |                         | 0 (0)                           |               | 4 (28.6)                        | 3 (23.1)         | 1 (8.3)                         | 3 (23.1)         | 4 (28.6)                        |
| ---Severe                                    |                         | 0 (0)                           |               | 0 (0)                           | 0 (0)            | 0 (0)                           | 0 (0)            | 0 (0)                           |
| <b>Treatments (n,%)</b>                      |                         |                                 |               |                                 |                  |                                 |                  |                                 |
| ---Treated with any medications              |                         | 3 (21.4)                        |               | 14 (100)                        | 8 (61.5)         | 6 (50.0)                        | 8 (61.5)         | 14 (100)                        |
| ---Treated with oral antihistamines          |                         | 3 (21.4)                        |               | 11 (78.6)                       | 6 (46.2)         | 5 (41.7)                        | 6 (46.2)         | 12 (85.7)                       |
| ---Treated with albuterol                    |                         | 0 (0)                           |               | 6 (42.9)                        | 2 (15.4)         | 2 (16.7)                        | 2 (15.4)         | 7 (50.0)                        |
| ---Treated with oral steroids                |                         | 0 (0)                           |               | 3 (21.4)                        | 1 (7.7)          | 1 (8.3)                         | 1 (7.7)          | 3 (21.4)                        |
| ---Treated with epinephrine                  |                         | 0 (0)                           |               | 2 (14.3)                        | 0 (0)            | 1 (8.3)                         | 0 (0)            | 3 (21.4)                        |
| Other                                        |                         | 1 (7.1)                         |               | 11 (78.6)                       | 3 (23.1)         | 3 (25.0)                        | 3 (23.1)         | 11 (78.6)                       |
| <b>Location (n,%)</b>                        |                         |                                 |               |                                 |                  |                                 |                  |                                 |
| Clinical Research Unit                       |                         | 3 (21.4)                        |               | 6 (42.9)                        | 1 (7.7)          | 0 (0)                           | 1 (7.7)          | 7 (50.0)                        |
| Home                                         |                         | 2 (14.3)                        |               | 14 (100)                        | 9 (69.2)         | 11 (91.7)                       | 9 (69.2)         | 14 (100)                        |
| Other                                        |                         | 0 (0)                           |               | 0 (0)                           | 1 (7.7)          | 1 (8.3)                         | 1 (7.7)          | 1 (7.1)                         |
| <b>Attenuating Circumstances (n,%)</b>       |                         |                                 |               |                                 |                  |                                 |                  |                                 |
| Exercise                                     |                         | 0 (0)                           |               | 4 (28.6)                        | 1 (7.7)          | 2 (16.7)                        | 1 (7.7)          | 5 (35.7)                        |
| Menses                                       |                         | 0 (0)                           |               | 1 (7.1)                         | 0 (0)            | 0 (0)                           | 0 (0)            | 1 (7.1)                         |
| Illness                                      |                         | 0 (0)                           |               | 5 (35.7)                        | 4 (30.8)         | 3 (25.0)                        | 4 (30.8)         | 7 (50.0)                        |
| Accidental Ingestion                         |                         | 0 (0)                           |               | 2 (14.3)                        | 1 (7.7)          | 0 (0)                           | 1 (7.7)          | 2 (14.3)                        |
| Other                                        |                         | 0 (0)                           |               | 4 (28.6)                        | 2 (15.4)         | 1 (8.3)                         | 2 (15.4)         | 5 (35.7)                        |

43 Abbreviations: AE- adverse event

44

45 Table S4. Difference in dosing-related reactions in year 2 vs year 1 of baked milk OIT for the initial active group  
46 (percentage of doses)

47

|                                                                                              | Year 1    | Year 2     | IRR (95% CI)     |
|----------------------------------------------------------------------------------------------|-----------|------------|------------------|
| <b>Doses</b>                                                                                 |           |            |                  |
| Total Doses (n)                                                                              | 5277      | 4450       |                  |
| Doses with symptoms (n, %)                                                                   | 2222 (42) | 827 (18.6) | 0.44 (0.41-0.48) |
| <b>Dosing related symptoms (number of dosing related reactions with symptom, % of doses)</b> |           |            |                  |
| Oropharyngeal                                                                                | 1537 (29) | 696 (15.6) | 0.54 (0.49-0.59) |
| Skin                                                                                         | 169 (3)   | 22 (0.5)   | 0.15 (0.09-0.24) |
| Gastrointestinal                                                                             | 846 (16)  | 134 (3.0)  | 0.19 (0.16-0.23) |
| Lower respiratory tract                                                                      | 83 (2)    | 16 (0.4)   | 0.23 (0.12-0.39) |

48

49 Abbreviations: OIT-oral immunotherapy; IRR- incidence rate ratio; CI- confidence interval

50

51 Table S5. Epinephrine use during the second year of the trial

52

| Related to Treatment | Reaction                                                                                                                                                                                                                                        | Modification of dosing                                                                               |
|----------------------|-------------------------------------------------------------------------------------------------------------------------------------------------------------------------------------------------------------------------------------------------|------------------------------------------------------------------------------------------------------|
| Yes                  | Subject dosed at home (500 mg) and developed pruritis, hives and shortness of breath. Family went to the emergency department where subject was treated with epinephrine, prednisone and famotidine. Family concern this was related to stress. | Took build-up BMOIT dose at home the following day (500 mg) prior to contacting us with no symptoms. |
| No                   | Medications used for treatment of allergic reaction to cashew includes epinephrine, bismuth subsalicylate, and diphenhydramine                                                                                                                  | None, Not related to BMOIT                                                                           |
| No                   | Ate oatmeal that contained milk (accidental ingestion). Used epinephrine. Was on 50mg of BMOIT (build-up)                                                                                                                                       | None, Not related to BMOIT                                                                           |
| No                   | Rash treated with diphenhydramine, and then rash worsened, and c/o itching. School nurse administered epinephrine. Mom brought subject to emergency department for observation. BMOIT dose not taken that day.                                  | None, Not related to BMOIT                                                                           |

53 Abbreviations: BMOIT- baked milk oral immunotherapy

Table S6. Detailed description of T cell populations selected for analysis

| Flow Populations             | Description                                                                                                                                             | Rationale for initial selection                                                      | p-value* |
|------------------------------|---------------------------------------------------------------------------------------------------------------------------------------------------------|--------------------------------------------------------------------------------------|----------|
| Treg                         | CD4+CD127-CD25+; increase across BMOIT                                                                                                                  | Tregs are associated with tolerance                                                  | 0.0104   |
| CM+CD127-CD25+               | Subset of antigen specific cells; increase across BMOIT                                                                                                 | Population identified in Lewis et. al to be increased with CMA-BR                    | 0.0002   |
| CM+                          | Sorted population of CM+ cells (CD154+ and/or CD137+); decrease across BMOIT                                                                            | Antigen specific population                                                          | 0.0002   |
| CM+NOT                       | Inverse population of CM+CD127-CD25+. Calculated as a %CD4 memory; decrease across BMOIT                                                                | Antigen specific population: Inverse population of CM+CD127-CD25+ from Lewis et. al. | <0.0001  |
| CD154+CD137-                 | Sub-population from the CM+ sort gate; decrease across BMOIT                                                                                            | Antigen specific population                                                          | 0.0415   |
| CD154+CD137+                 | Sub-population from the CM+ sort gate; decrease across BMOIT                                                                                            | Antigen specific population                                                          | <0.0001  |
| total CD154+                 | Sub-population from the CM+ sort gate; decrease across BMOIT                                                                                            | Antigen specific population                                                          | <0.0001  |
| <b>scRNA-Seq Populations</b> |                                                                                                                                                         |                                                                                      |          |
| CM+FOXP3+                    | CM+ cells expressing <i>FOXP3</i> ; increase across BMOIT                                                                                               | Population identified in Lewis et. al to be increased in CMA compared to non-CMA     | 0.0009   |
| CM+ Th2A                     | Based on gene module with >0.25 expression level/cell. Gene signature is based on previous studies describing pathogenic Th2/Tfh; decrease across BMOIT | Population identified in Lewis et. al to be increased in CMA compared to non-CMA     | 0.008    |
| Ratio CM+FOXP3+/Th2A         | Ratio of CM+FOXP3+/CM+Th2A populations described above; Increase over BMOIT                                                                             | Ratio of populations identified in Lewis et. al                                      | 0.0033   |
| CM+ C3                       | CM+ FOXP3+ Cluster 3 with high MHC II gene expression; increase across BMOIT                                                                            | CM+ cluster population                                                               | 0.0002   |
| CM+ C5                       | CM+ FOXP3- Cluster 5 with Th1/Th17 gene expression; decrease across BMOIT                                                                               | CM+ cluster population                                                               | 0.0001   |
| CM+ C4                       | CM+ FOXP3- Cluster 4 with CCR7 gene expression; decrease across BMOIT                                                                                   | CM+ cluster population                                                               | 0.009    |
| CM+ C10                      | CM+ FOXP3+ Cluster 10 with high CD137 and chemokine gene expression; no change across BMOIT                                                             | CM+ cluster population                                                               | 0.708    |
| CM+ C18                      | CM+ FOXP3+ Cluster 18 with interferon-responsive gene signature; no change across BMOIT                                                                 | CM+ cluster population                                                               | 0.562    |
| CM+ C22                      | CM+ FOXP3- Cluster 22 with Th2 gene expression; no change across BMOIT                                                                                  | CM+ cluster population                                                               | 0.838    |

\*p-value significance calculated between Month 0 and 24 (paired t-test)

56 Table S7. Baked milk oral immunotherapy dosing schedule

| Dose # | Milk dose (mg) of milk protein | Study Phase                         | Comments                 |
|--------|--------------------------------|-------------------------------------|--------------------------|
| 1      | 0.1                            | Initial Dose Escalation             |                          |
| 2      | 0.2                            |                                     |                          |
| 3      | 0.4                            |                                     |                          |
| 4      | 0.8                            |                                     |                          |
| 5      | 1.5                            |                                     |                          |
| 6      | 3                              |                                     | Minimal starting dose    |
| 7      | 6                              | Initial Dose Escalation or build-up |                          |
| 8      | 12                             |                                     |                          |
| 9      | 25                             |                                     |                          |
| 10     | 37.5                           | Build-up                            |                          |
| 11     | 50                             |                                     |                          |
| 12     | 75                             |                                     |                          |
| 13     | 125                            |                                     |                          |
| 14     | 200                            |                                     |                          |
| 15     | 300                            |                                     |                          |
| 16     | 500                            |                                     |                          |
| 17     | 750                            |                                     | Minimum maintenance dose |
| 18     | 1000                           |                                     |                          |
| 19     | 1500                           |                                     |                          |
| 20     | 2000                           | Maintenance                         | Goal Maintenance dose    |

57  
58  
59

60 Table S8. Dosing Schedule for Double-Blind, Placebo-Controlled Food Challenges

| Dose # | Baseline                         |                         | Month-12<br>Blinded year of OIT  |                         | Month-24<br>Open-label OIT       |                         | Month-24<br>Open-label OIT       |                         |
|--------|----------------------------------|-------------------------|----------------------------------|-------------------------|----------------------------------|-------------------------|----------------------------------|-------------------------|
|        | Baked Milk                       |                         | Baked Milk                       |                         | Baked Milk                       |                         | Unheated Milk                    |                         |
|        | Milk Protein/<br>Placebo<br>(mg) | Cumulative<br>Dose (mg) | Milk Protein/<br>Placebo<br>(mg) | Cumulative<br>Dose (mg) | Milk Protein/<br>Placebo<br>(mg) | Cumulative<br>Dose (mg) | Milk Protein/<br>Placebo<br>(mg) | Cumulative<br>Dose (mg) |
| 1      | 1                                | 1                       | 1                                | 1                       | X                                | X                       | 30                               | 30                      |
| 2      | 3                                | 4                       | 3                                | 4                       | X                                | X                       | 100                              | 130                     |
| 3      | 10                               | 14                      | 10                               | 14                      | X                                | X                       | 300                              | 430                     |
| 4      | 30                               | 44                      | 30                               | 44                      | X                                | X                       | 600                              | 1030                    |
| 5      | 100                              | 144                     | 100                              | 144                     | X                                | X                       | 1000                             | 2030                    |
| 6      | 300                              | 444                     | 300                              | 444                     | 444                              | 444                     | 1500                             | 3530                    |
| 7      |                                  |                         | 600                              | 1044                    | 600                              | 1044                    | 2000                             | 5530                    |
| 8      |                                  |                         | 1000                             | 2044                    | 1000                             | 2044                    | 2500                             | 8030                    |
| 9      |                                  |                         | 2000                             | 4044                    | 2000                             | 4044                    |                                  |                         |

61 Doses listed are milligrams of milk protein or the equivalent amount of placebo powder.

62 Table S9. Detailed model parameters

| Features           | Outcome           | Best Model            | Hyper-parameters                                                                                                       | Mean AUC (SD) | Cross-validation                      |
|--------------------|-------------------|-----------------------|------------------------------------------------------------------------------------------------------------------------|---------------|---------------------------------------|
| Baseline           | Baked Milk OFC    | Random Forest         | RandomForestClassifier(max_depth=1, max_features='log2', n_estimators=10, random_state=0)                              | 0.647 (0.261) | kfold:<br>n_splits=3,<br>n_repeats=10 |
| One Year Treatment | Baked Milk OFC    | Elastic Net- Logistic | SGDClassifier(alpha=0.5, class_weight='balanced', l1_ratio=0.5, loss='log_loss', penalty='elasticnet', random_state=0) | 0.552 (0.159) | kfold:<br>n_splits=3,<br>n_repeats=10 |
| Baseline           | Unheated Milk OFC | Ridge- Logistic       | SGDClassifier(alpha=0.5, loss='log_loss', random_state=0)                                                              | 0.621 (0.285) | kfold:<br>n_splits=5,<br>n_repeats=10 |
| 24 Months          | Unheated Milk OFC | Ridge- Logistic       | SGDClassifier(alpha=0.1, loss='log_loss', random_state=0)                                                              | 0.806 (0.274) | kfold:<br>n_splits=5,<br>n_repeats=10 |

63 Abbreviations: AUC, area under the curve; SD, standard deviation; OFC, oral food challenge

64 Supplemental Figures

65

66

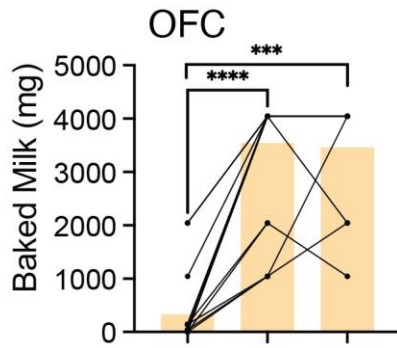

67 Time on Treatment: 0 12 24

68 **Figure S1. Maximum cumulative tolerated dose of baked milk by time on treatment.** Baked milk oral food challenge  
69 outcomes indicated by maximum tolerated dose (mg) per subject grouped by time on treatment. Bars are median  
70 values. \*\*\*= $<0.001$ , \*\*\*\*= $<0.0001$

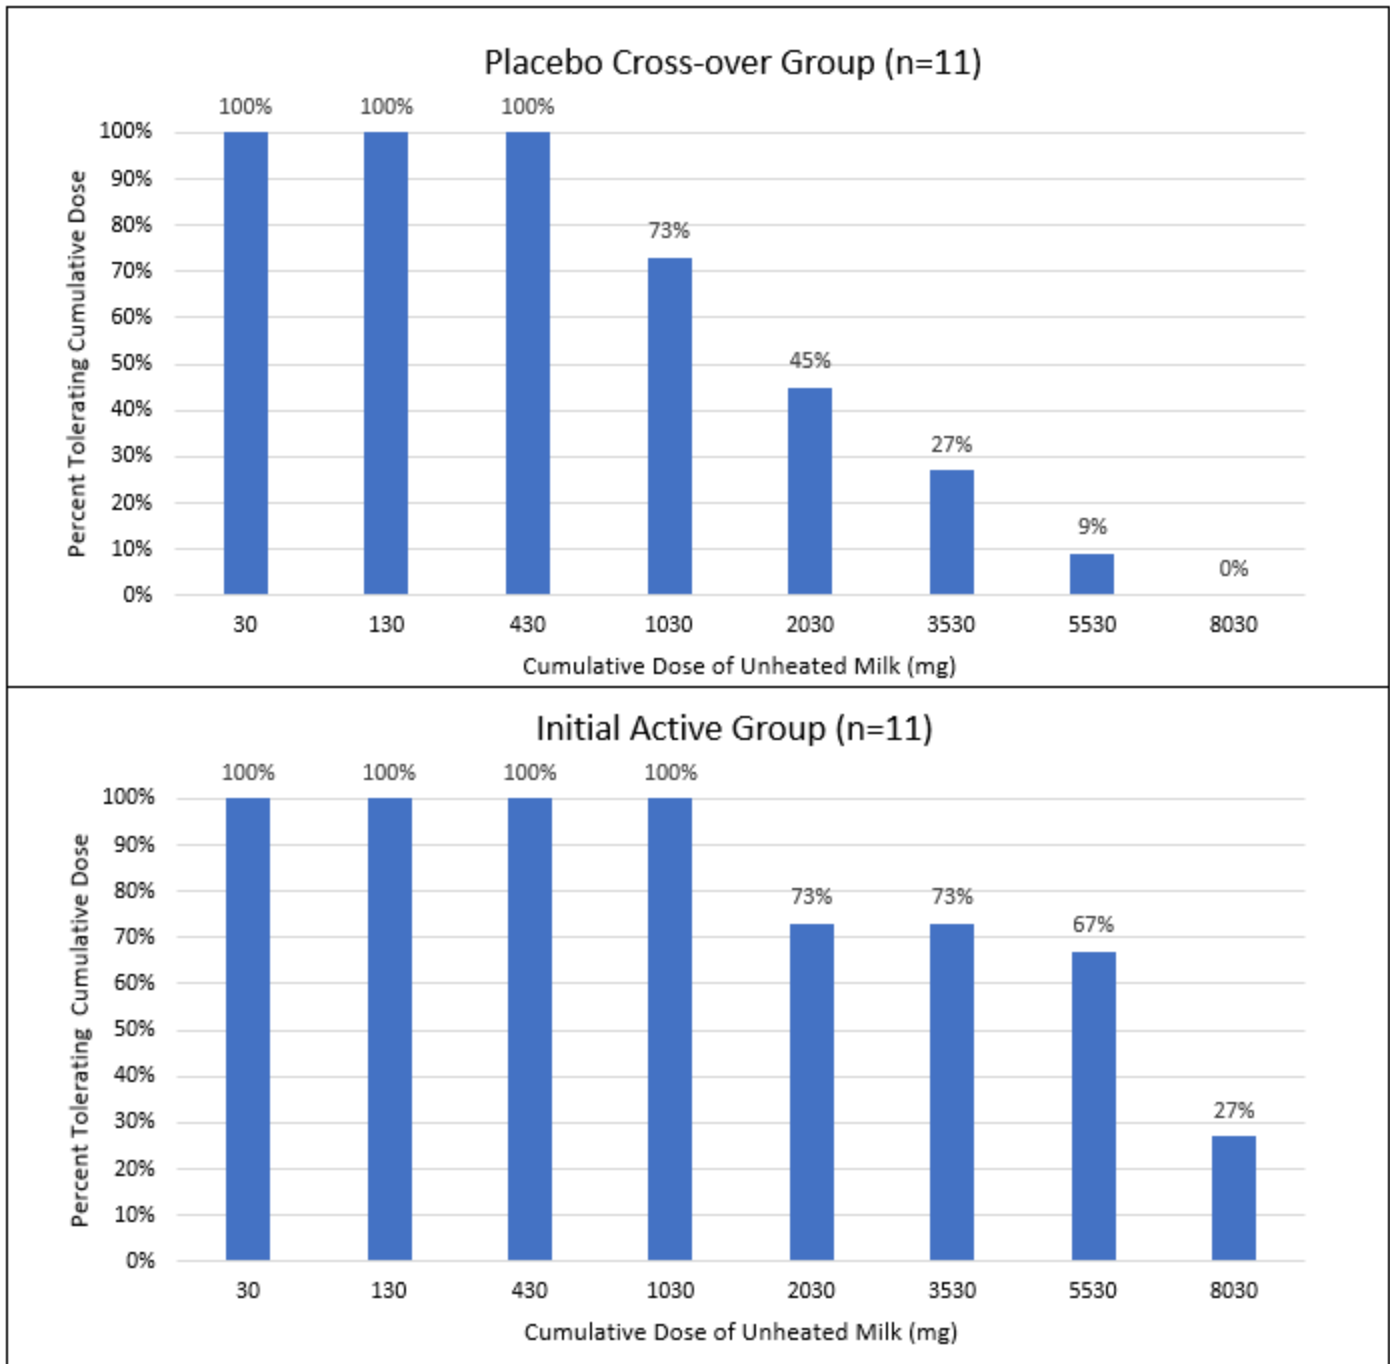

71

72

73 **Figure S2. Percent tolerating dose of unheated milk during month-24 DBPCFC.** Percent tolerating cumulative dose of  
 74 unheated milk (mg of milk protein) during the month-24 DBPCFC, by group. Included those who completed the food  
 75 challenge

76 Abbreviation: DBPCFC, double-blind placebo-controlled food challenge

77

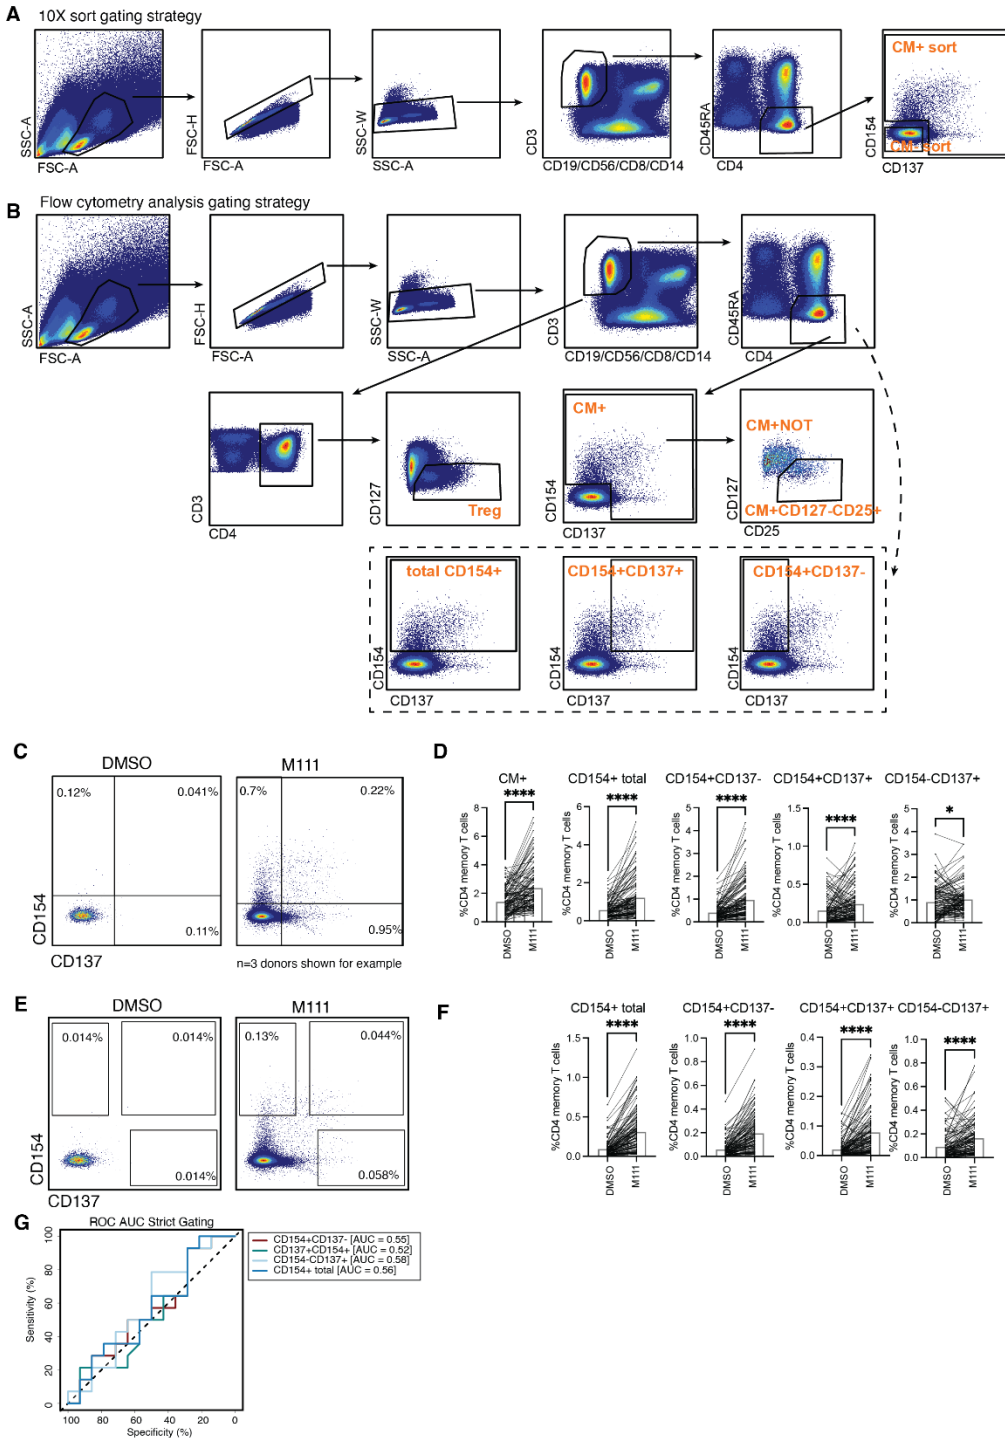

**Figure S3.** Sort and flow supplemental. **A)** Gating strategy for sort. **B)** Gating strategy flow cytometry analysis. **C)** DMSO/M111 examples following sort gating. **D)** Dot plots showing DMSO and M111 percentages in each indicated population. **E)** DMSO/M111 examples following strict gating. **F)** Dot plots showing DMSO and M111 percentages in each indicated population. **G)** ROC AUC analysis of strict gated populations. Statistical analysis was performed using paired Wilcoxon tests where  $p < 0.0001 = ****$  and  $p < 0.05 = *$ .

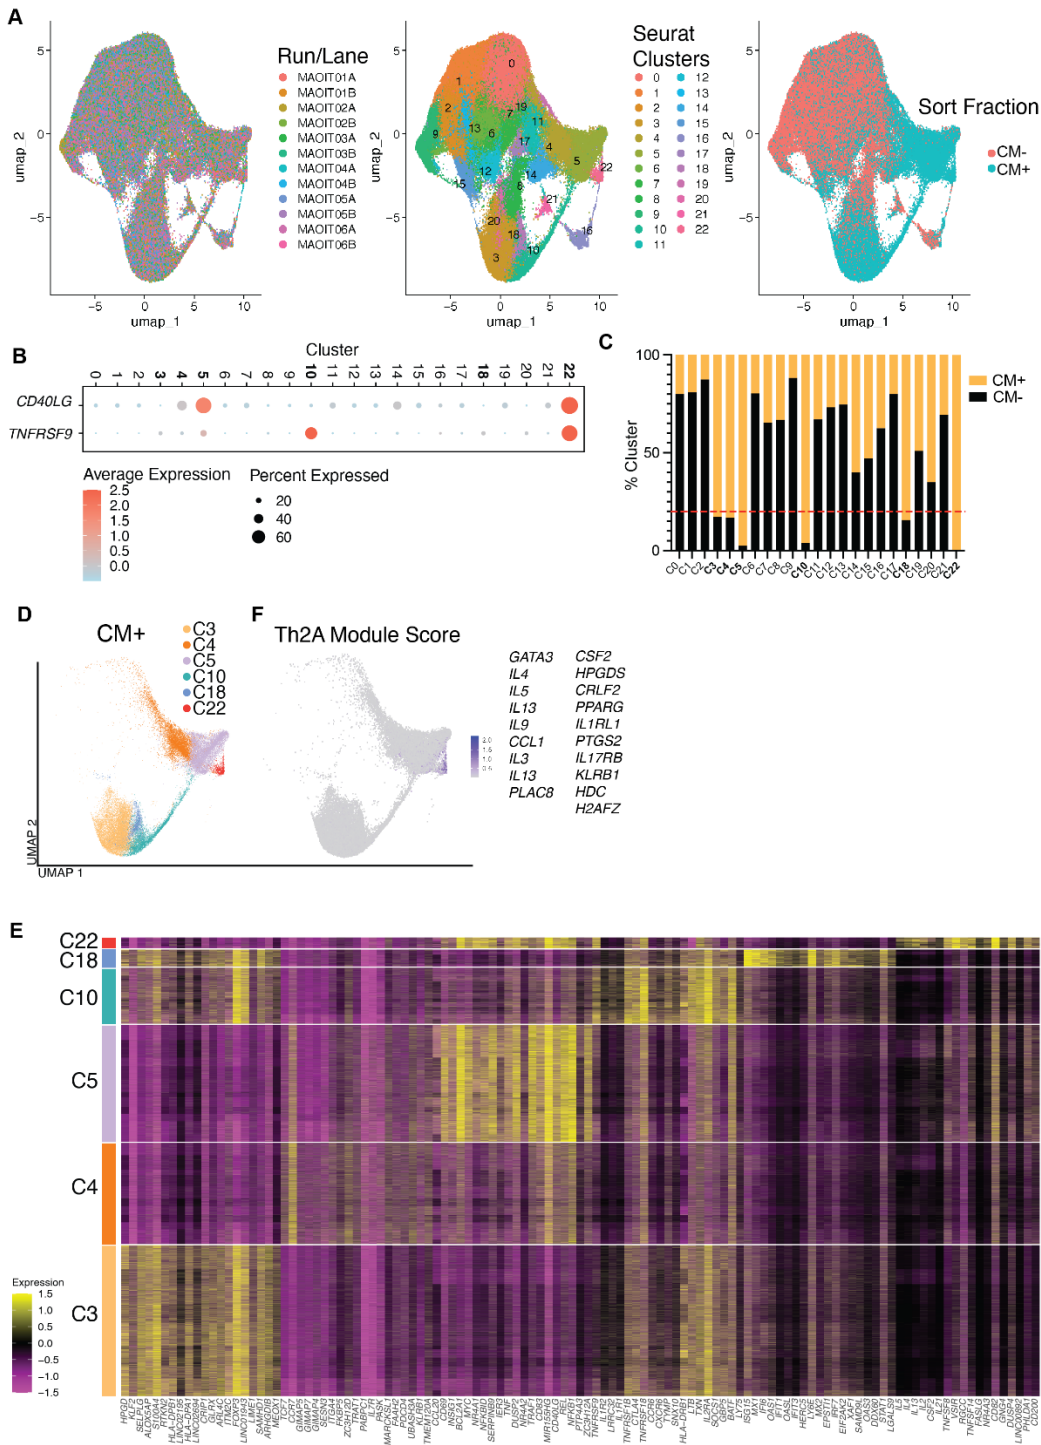

86

87 **Figure S4. scRNA-Seq supplemental. A)** UMAP plots showing run lane (left), Seurat clusters (middle), and antigen  
 88 specific sort fraction (right). **B)** Dot plot showing RNA expression of sort markers across all clusters. **C)** Bar plot showing  
 89 percentage of cells in each cluster labeled by sort fraction. **D)** UMAP of selected CM+ clusters. **E)** Heatmap of highly  
 90 expressed genes in each CM+ cluster. **F)** UMAP of selected CM+ clusters colored by pathogenic Th2 module score.

91

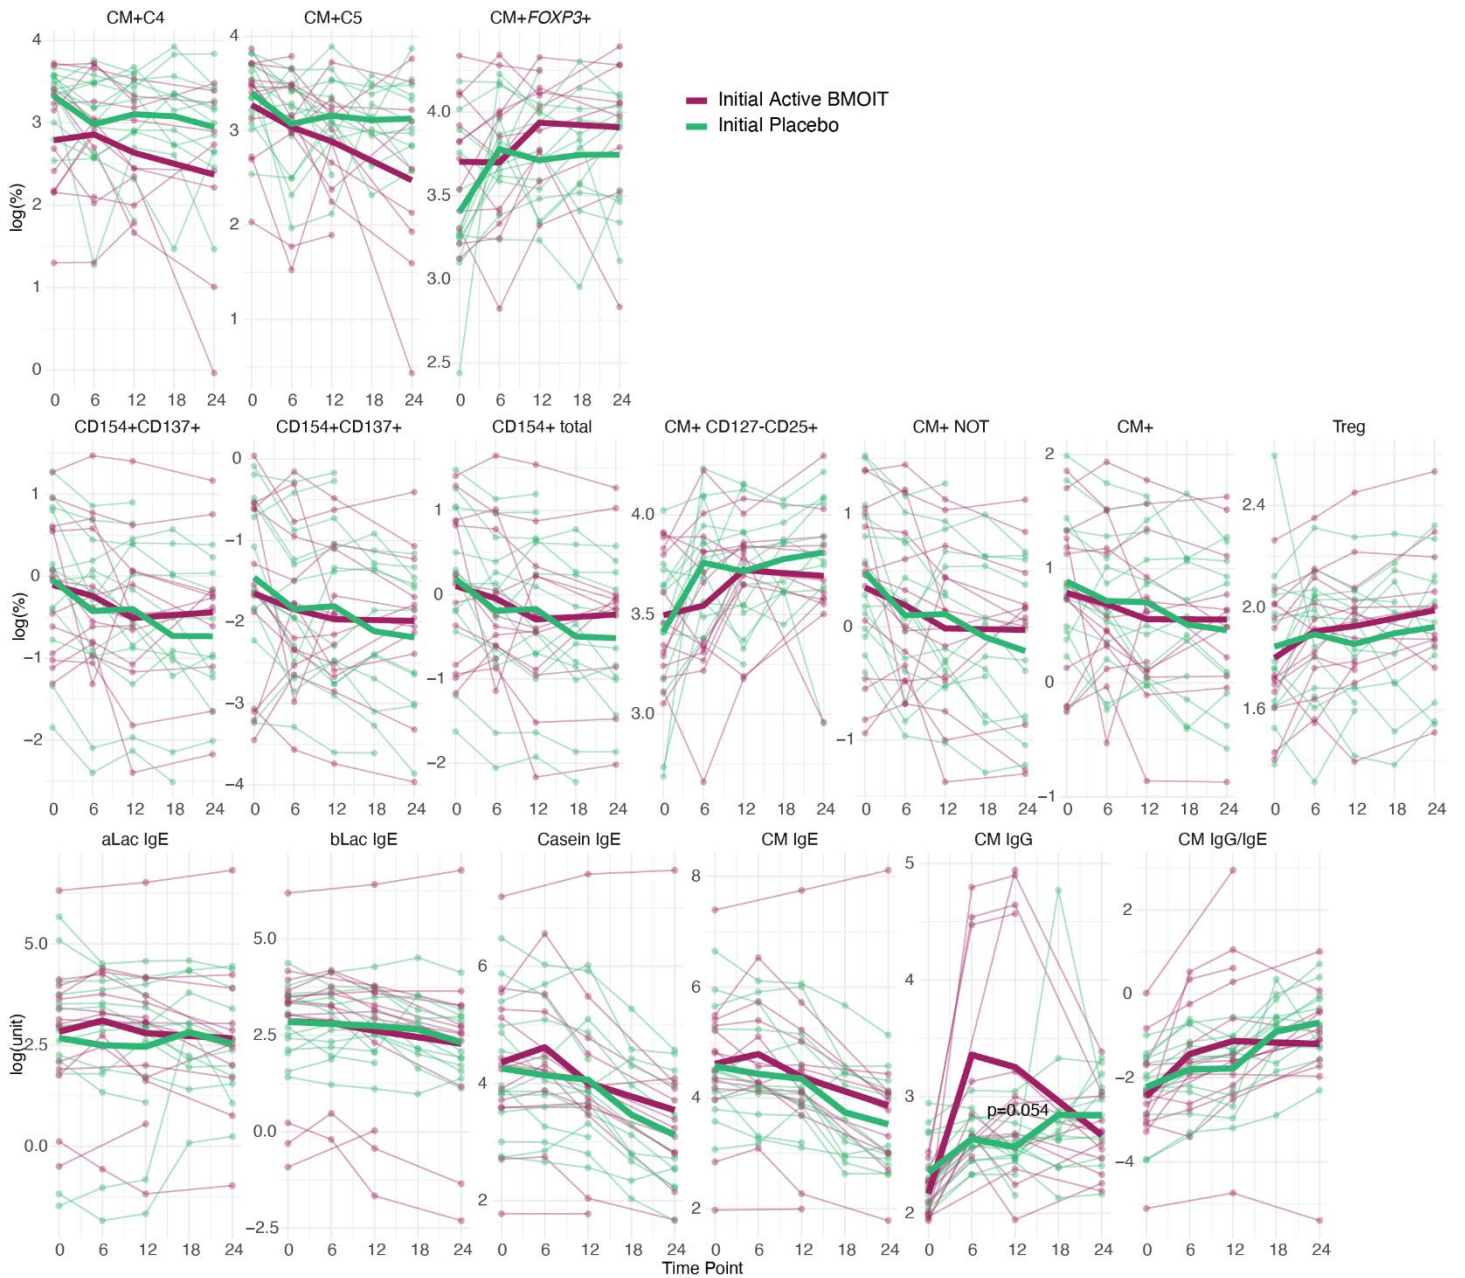

92

93 **Figure S5. T cell and antibody measurements by treatment group across all time point.** Line plots showing all T cell  
 94 populations and antibody measurements across all timepoints colored by treatment group. Lines connect each subject  
 95 and the bolded lines are the means of that group.

96 Abbreviations: BMOIT, baked milk oral immunotherapy

97

98

99

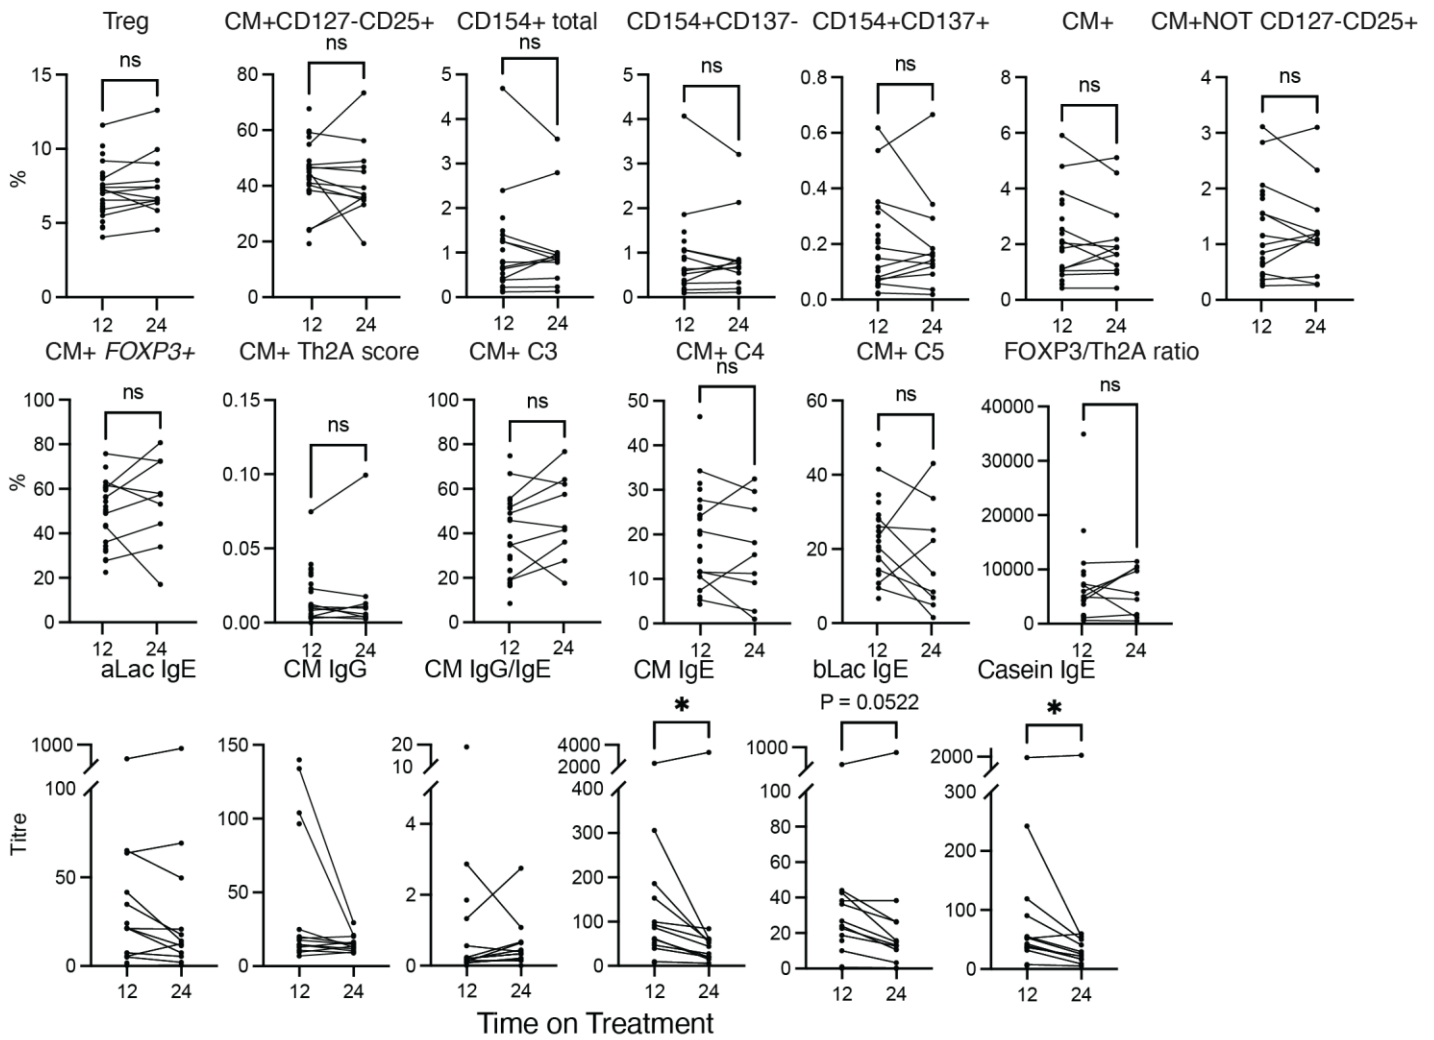

100

101 **Figure S6. Population changes from 12 to 24 months on treatment.** Line plots comparing 12 to 24 month timepoints for  
 102 each T cell population and antibody measurement. Subjects with data at both timepoints are connected with a line.  
 103 Statistics were run by both paired and unpaired t-test. Significances noted here are paired analysis.

104

105

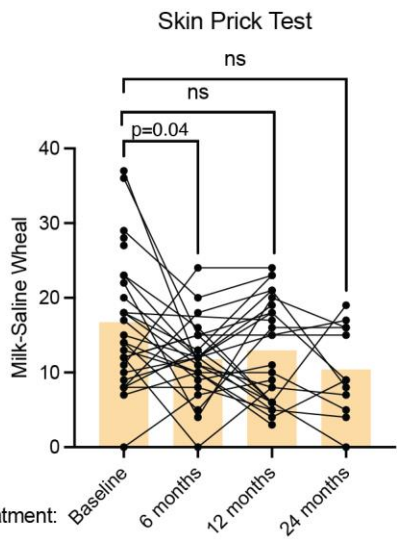

Time on Treatment: Baseline 6 months 12 months 24 months

106

107

108

**Figure S7. Skin prick test.** Milk skin prick test results reported as Milk minus Saline Wheal measurement and grouped by time on treatment.

109

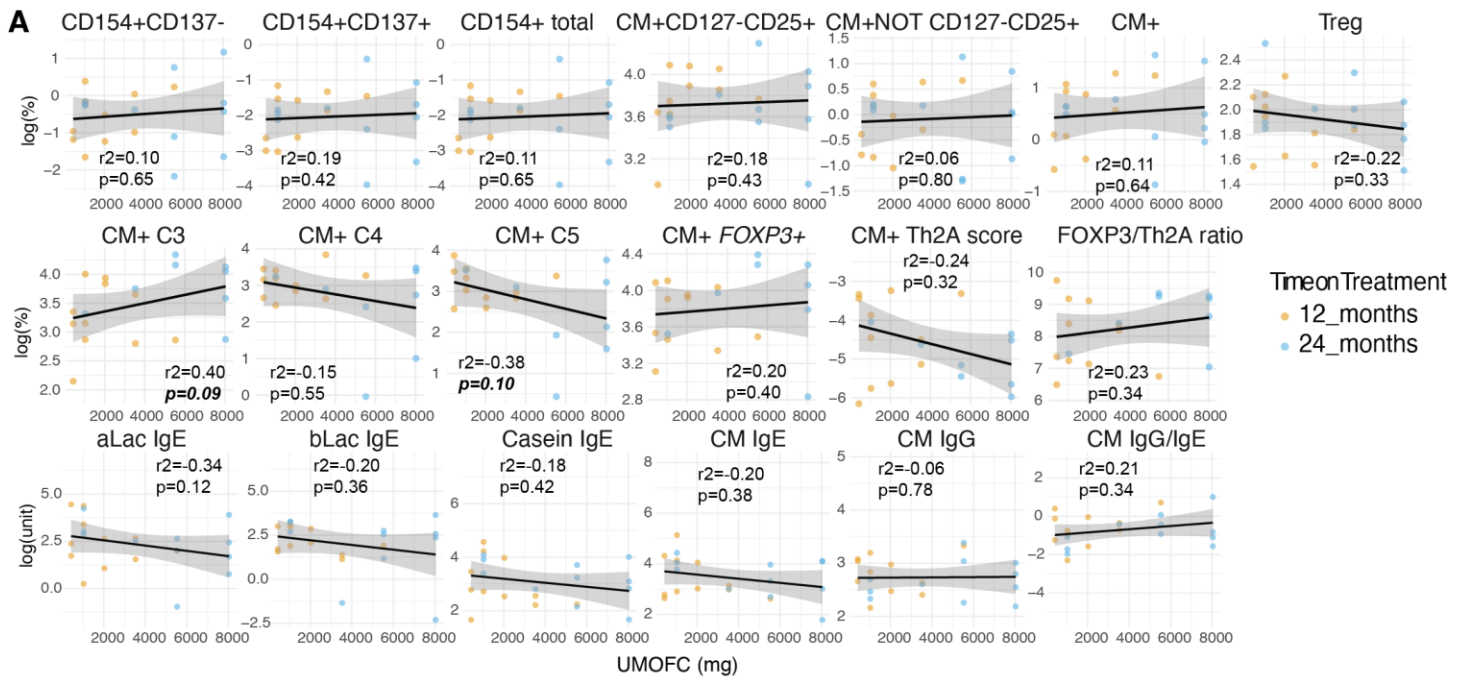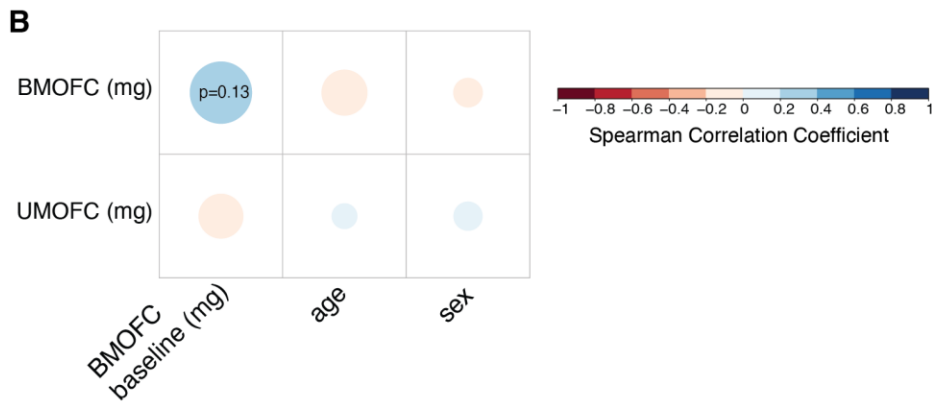

110  
 111 **Figure S8. Correlation analysis supplemental. A)** Scatter plots showing correlations of antibody measurements, scRNA-  
 112 Seq populations, and flow cytometry populations with UMOFC doses (mg). Color of the dot represents treatment  
 113 timepoint. Significance of correlations are noted on the plots. **B)** Correlations of BMOFC and UMOFC outcomes (mg)  
 114 with clinical features where color and size of the dot represent spearman correlation coefficients.

### Appendix 1. Full inclusion/exclusion Criteria

#### 1. Inclusion/Exclusion Criteria

Patients who meet *all* the following criteria are eligible for enrollment as study participants, including participants who:

- Are age 3-18 years, male or female, any ethnicity or race
- Provide signed informed consent by parent or legal guardian and informed assent if applicable
- Have a history of symptomatic reactivity to cow's milk (i.e. eczema, urticarial, upper or lower respiratory symptoms, GI disturbances, rash, oral symptoms)
- Have a skin prick test positive to milk (diameter of wheal 3 mm  $\geq$  negative control) and serum milk-specific IgE level  $>5$  kU/L within the past 6-12 months
- Have a positive reaction to a cumulative dose of  $\leq 444$  mg of baked milk protein in the initial qualifying DBPCFC.
- Use an effective method of contraception by females of childbearing potential to prevent pregnancy and agree to continue to practice an acceptable method of contraception for the duration of their participation in the study.
- Have self-injectable epinephrine available at all times

Patients who meet *any* of these criteria are not eligible for enrollment as study participants, including participants who:

- Have a history of severe anaphylaxis resulting in hypotension, neurological compromise, or mechanical ventilation
- Have a history of intubation related to asthma
- Tolerate more than 444 mg of baked milk protein at the initial qualifying DBPCFC.
- Allergy to placebo ingredients OR reacts to any dose of placebo during the qualifying OFC.

- 142
- Poor control of atopic dermatitis
- 143
- Are unable to tolerate at least 3 mg of baked milk protein on dose escalation day
- 144
- Are pregnant or lactating
- 145
- Have severe asthma defined by 2007 NHLBI Criteria Steps 5 or 6
- 146
- Have severe or poorly controlled asthma defined by with any of the following criteria:
- 147
1. FEV1<80% of predicted
- 148
2. ICS dosing of >500 mcg daily of fluticasone (or equivalent inhaled corticosteroids based
- 149
- on NHLBI dosing chart) or
- 150
3. ≥ 1 hospitalization in the past year for asthma or
- 151
4. > 1 ER visit in the past 6 months for asthma
- 152
- Use of steroid medications (oral steroids, such as prednisone or Medrol, steroid injections, such as
- 153
- Kenalog, or IV or oral corticosteroid burst) in the following manners: History of daily oral steroid dosing
- 154
- within 4 weeks prior to baseline visit *or* for > 1 month during the past year *or* >2 burst oral steroid
- 155
- courses in the past 6 months.
- 156
- Are unable to discontinue antihistamines for 5 days for long acting and 3 days for short acting prior to
- 157
- skin testing or food challenges
- 158
- Are receiving omalizumab, mepolizumab, beta- blocker, ACE inhibitor, angiotensin-receptor blockers,
- 159
- calcium channel blockers, or tricyclic antidepressant therapy
- 160
- Have used immunomodulatory therapy (not including corticosteroids) or biologic therapy within the
- 161
- past year
- 162
- Have participated in any interventional study for treatment of a food allergy in the past 6 months
- 163
- Are on ‘build up phase’ of environmental allergen immunotherapy. Subjects tolerating maintenance
- 164
- allergen immunotherapy can be enrolled.
- 165
- Have a history of eosinophilic esophagitis in the past 3 years
- 166
- Have a chronic disease (other than asthma, atopic dermatitis, rhinitis) requiring therapy (e.g., heart
- 167
- disease, diabetes)

168

- Have used an investigational drug within 90 days or plan to use an investigational drug during the study period

169

170

- Severe reaction at initial DBPCFC, defined as:

171

- Life-threatening anaphylaxis

172

- Requiring overnight hospitalization

173

174 **Appendix 2. Study Product Details**

175  
176 The milk powder (organic, nonfat dry milk powder) was purchased by the University of North Carolina (UNC)  
177 from Milky Whey, Inc. & TMW International. UNC analyzed the milk protein content in each lot and performed SDS-  
178 PAGE, densitometry analysis, and bioburden testing. The placebo, irradiated tapioca flour was purchased by UNC from  
179 Ener-G Foods Inc. UNC analyzed each lot for the absence of milk protein and performed SDS-PAGE, densitometry  
180 analysis, and bioburden testing. UNC provided individualized packaged doses for dispensing for home dosing and bulk  
181 product for use by JHH nutritionist. Tapioca flour was selected due to similarity in appearance.

182 Participants were given instructions on how to prepare, store, and administer the OIT dose at home. The OIT  
183 powder was stored in the refrigerator. To prepare the dose, the family was instructed to prepare a cupcake or muffin  
184 batter using any preferred, dairy-free recipe that was also free from their child's other allergens. They then poured the  
185 batter into a regular size muffin tray. Then, added 1 pre-measured OIT powder dose to each individual muffin tin and  
186 stirred well. The cupcake or muffin was then required to be baked at 350°F for at least 30 minutes. The child was  
187 instructed to ingest one cupcake or muffin each day. Instructions were given for avoiding strenuous exercise for at least  
188 2 hours after taking their dose. Participants were advised to contact the study team if the child missed a dose or if they  
189 were ill.

190 All doses given during a food challenge or in clinic were prepared according to our Standard of Operation for  
191 Oral Food Challenge Preparation with pre-specified cake recipes developed by the Johns Hopkins Research Nutrition  
192 Team.

194 **Appendix 3. Double-blind, placebo-controlled food challenge details**

195 The baseline baked milk food challenge was performed as a DBPCFC with the active portion consisting of cake  
196 with 444mg of baked milk protein. The cake was administered over six steps (1mg, 3mg, 10mg, 30mg, 100mg, and  
197 300mg milk protein). For the placebo portion of the DBPCFC, tapioca flour was substituted for milk in the cake recipe.  
198 The cake was prepared using pre-specified recipes developed by the JH Research Nutrition Team. The month 12 baked  
199 milk DBPCFC had a cumulative dose of 4044mg (1mg, 3mg, 10mg, 30mg, 100mg, 300mg, 600mg, 1000mg, and 2000mg  
200 milk protein). The month 24 baked milk DBPCFC had a cumulative dose of 4044mg, but a higher starting dose since all  
201 participants were known to be on active treatment (444mg, 600mg, 1000mg, 2000mg milk protein). The month 24  
202 unheated milk challenge had a maximum cumulative dose of 8030mg (30mg, 100mg, 300mg, 600mg, 1000mg, 1500mg,  
203 2000mg, 2500mg). MTD was defined as the maximum cumulative dose of milk protein ingested without dose-limiting  
204 symptoms.

## Appendix 4. Sample Size, Randomization, and Blinding

### Sample Size

The sample size was determined based on 1) data from previous studies and 2) hypothesis testing for test of difference in proportions. Based on prior studies, we anticipated that at most 10% of subjects in the placebo arm and at least 60% of subjects in the treatment arm would tolerate 4 grams of baked milk at the month-12 DBPCFC. To achieve an alpha of 0.05 and a power of 0.8, 14 subjects were needed in each group. We choose 15 participants per group to allow for a 7% drop out rate.

### Randomization

Patients were randomized with a one-to-one allocation of treatment to placebo using a block randomization scheme. Patients were enrolled by a study nurse or clinician. When the patient had been deemed eligible for randomization, a study nurse or clinician communicated the need for randomization to the research pharmacist using a "Randomization Request" form. The research pharmacist randomized the patient using the random code. The random code was generated using computer generated sheets with block stratified assignment of block size of six, 1:1 distribution of active to placebo. The participants were randomized using the next available slot on the random code, which indicated whether the participant was randomized to active or to placebo.

After randomization, the research pharmacist recorded the patient's assignment in the randomization log. They also shared a copy of the patient's randomization assignment with the nutritionist. The research pharmacist sent confirmation of randomization (but not randomization assignment) to the study nurse or clinician.

### Blinding

Patients, study coordinators, nurses, and clinicians were blinded to treatment arm assignment. The pharmacist and nutritionist remained un-blinded and had access to the randomization log. The pharmacist dispensed the patient's home dosing supplies upon request by the clinician. The investigational product was labeled with a blinded label and an unblinded tear-off label indicating whether the product was active or placebo. The unblinded tear-off label was removed by the unblinded pharmacy staff prior to dispensing. The nutritionist prepared and dispensed the appropriate dose for

232 the subject to take in the PCRU (during the oral food challenges, initial dose escalation day, and up-dosing) once a  
233 request had been made by the clinician. The in-office dosing kits were labeled with a blinded label. Thus, the study  
234 clinicians and patients remained blinded to treatment arm assignment.

235

236

237 **Appendix 5. Impact of COVID-19 pandemic**

238

239           Due to the COVID-19 pandemic, in-person research visits were stopped from March 2020 until July 2020. Those

240 on build-up remained on their current dose and those in maintenance continued their 2000 mg dose. Participants were

241 shipped investigational product during this time with virtual visits performed every 2 weeks to 2 months depending on

242 treatment phase. In summary, 17 participants (8- initial BMOIT group, 9-placebo cross-over group) were in year 2 at this

243 time with 6 having additional time in build-up, 2 with additional time in maintenance, and 1 delaying their cross-over

244 IDE.

245 Full protocol can be accessed by contacting the authors and is available on [clinicaltrials.gov](https://clinicaltrials.gov).
